# Supplementary material for: Public acceptability of proposals to manage new takeaway food outlets near schools: cross-sectional analysis of the 2021 International Food Policy Study
Source: PubMed Central journal article supplement (PMC11614041; doi:10.1080/23748834.2024.2336311), 2024-04-19
Supplement: RCAH_A_2336311_SM3494.pdf [file RCAH_A_2336311_SM3494.pdf]

## SUPPLEMENTARY MATERIAL

Table 1: Weighted summary statistics for adult respondents living in the UK (n=4196). Data were from Wave 5 of the International Food Policy Study, collected November-December 2021.

| Measure                                                   | Category                        | N=4196 <sup>1</sup> |
|-----------------------------------------------------------|---------------------------------|---------------------|
| Age (years - mean (SD))                                   |                                 | 48.5 (17.2)         |
| Age group (years)                                         | 18-29                           | 806 (19.2%)         |
|                                                           | 30-44                           | 1026 (24.5%)        |
|                                                           | 45-59                           | 1058 (25.2%)        |
|                                                           | 60 or over                      | 1306 (31.1%)        |
| Sex                                                       | Male                            | 2052 (48.9%)        |
|                                                           | Female                          | 2144 (51.1%)        |
| Ethnic group identified with                              | Majority                        | 3702 (88.2%)        |
|                                                           | Minority                        | 470 (11.2%)         |
|                                                           | Not stated                      | 25 (0.6%)           |
| Education level                                           | Low                             | 2089 (49.8%)        |
|                                                           | Medium                          | 888 (21.2%)         |
|                                                           | High                            | 1182 (28.2%)        |
|                                                           | Not stated                      | 37 (0.9%)           |
| Ability to make ends meet                                 | Very difficult                  | 248 (5.9%)          |
|                                                           | Difficult                       | 650 (15.5%)         |
|                                                           | Neither easy nor difficult      | 1494 (35.6%)        |
|                                                           | Easy                            | 1051 (25.0%)        |
|                                                           | Very easy                       | 699 (16.6%)         |
|                                                           | Refuse to answer                | 27 (0.6%)           |
|                                                           | Don't know                      | 28 (0.7%)           |
| Child under 18 years in household                         | Yes                             | 1198 (28.6%)        |
|                                                           | No                              | 2990 (71.3%)        |
|                                                           | Not stated                      | 7 (0.2%)            |
| Quartile (Q) of neighbourhood food outlet count           | Q1 (0-9 outlets)                | 878 (24.2%)         |
|                                                           | Q2 (20-25 outlets)              | 904 (24.9%)         |
|                                                           | Q3 (26-55 outlets)              | 916 (25.2%)         |
|                                                           | Q4 (56-582 outlets)             | 930 (25.6%)         |
|                                                           | Unknown                         | 568 (NA)            |
| Number of meals purchased from takeaways in the past week | 0                               | 692 (16.5%)         |
|                                                           | 1                               | 1136 (27.1%)        |
|                                                           | 2 or more                       | 817 (19.4%)         |
|                                                           | Question not asked <sup>2</sup> | 1530 (36.5%)        |
|                                                           | Don't know                      | 10 (0.2%)           |
|                                                           | Refuse to answer                | 11 (0.3%)           |
| Perceived takeaway number appropriateness                 | Too many                        | 1764 (42.0%)        |
|                                                           | Too few                         | 246 (5.9%)          |
|                                                           | About the right number          | 1916 (45.7%)        |
|                                                           | Refuse to answer                | 11 (0.3%)           |
|                                                           | Don't know                      | 259 (6.2%)          |
| Takeaways:                                                |                                 |                     |
| Usually sell food that is affordable                      | Agree                           | 2036 (48.5%)        |
|                                                           | Disagree                        | 504 (12.0%)         |
|                                                           | Neutral                         | 1569 (37.4%)        |
|                                                           | Refuse to answer                | 6 (0.2%)            |
|                                                           | Don't know                      | 80 (1.9%)           |
| Usually sell food that is poor quality                    | Agree                           | 1134 (27.0%)        |
|                                                           | Disagree                        | 948 (22.6%)         |
|                                                           | Neutral                         | 2015 (48.0%)        |
|                                                           | Refuse to answer                | 4 (0.1%)            |
|                                                           | Don't know                      | 94 (2.2%)           |
| Usually sell healthy food                                 | Agree                           | 559 (13.3%)         |
|                                                           | Disagree                        | 2244 (53.5%)        |
|                                                           | Neutral                         | 1285 (30.6%)        |
|                                                           | Refuse to answer                | 5 (0.1%)            |
|                                                           | Don't know                      | 103 (2.5%)          |
| Cause litter, noise and smells                            | Agree                           | 2260 (53.9%)        |
|                                                           | Disagree                        | 486 (11.6%)         |
|                                                           | Neutral                         | 1349 (32.1%)        |
|                                                           | Refuse to answer                | 7 (0.2%)            |

|                                                          |                    |              |
|----------------------------------------------------------|--------------------|--------------|
|                                                          | Don't know         | 95 (2.3%)    |
| Cause antisocial behaviour                               | Agree              | 1064 (25.3%) |
|                                                          | Disagree           | 1165 (27.8%) |
|                                                          | Neutral            | 1812 (43.2%) |
|                                                          | Refuse to answer   | 5 (0.1%)     |
|                                                          | Don't know         | 150 (3.6%)   |
| Contribute to the local economy                          | Agree              | 2412 (57.5%) |
|                                                          | Disagree           | 282 (6.7%)   |
|                                                          | Neutral            | 1352 (32.2%) |
|                                                          | Refuse to answer   | 8 (0.2%)     |
|                                                          | Don't know         | 142 (3.4%)   |
| Support for management zone adoption <sup>3</sup>        | Support            | 1944 (46.3%) |
|                                                          | Oppose             | 404 (9.6%)   |
|                                                          | Neutral            | 1578 (37.6%) |
|                                                          | Refuse to answer   | 7 (0.2%)     |
|                                                          | Don't know         | 263 (6.3%)   |
| Perceived effectiveness of management zone adoption      | Somewhat effective | 1992 (47.5%) |
|                                                          | Mostly effective   | 564 (13.4%)  |
|                                                          | Very effective     | 300 (7.1%)   |
|                                                          | Not effective      | 992 (23.7%)  |
|                                                          | Refuse to answer   | 9 (0.2%)     |
|                                                          | Don't know         | 339 (8.1%)   |
| Following management zone adoption:                      |                    |              |
| Takeaways would be replaced by healthier food outlets    | Agree              | 1707 (40.7%) |
|                                                          | Disagree           | 611 (14.6%)  |
|                                                          | Neutral            | 1641 (39.1%) |
|                                                          | Refuse to answer   | 4 (0.1%)     |
|                                                          | Don't know         | 233 (5.5%)   |
| It would be easier for schools to promote healthier food | Agree              | 1778 (42.4%) |
|                                                          | Disagree           | 736 (17.5%)  |
|                                                          | Neutral            | 1469 (35.0%) |
|                                                          | Refuse to answer   | 4 (0.1%)     |
|                                                          | Don't know         | 209 (5.0%)   |
| Young people would eat takeaway food less often          | Agree              | 1478 (35.2%) |
|                                                          | Disagree           | 999 (23.8%)  |
|                                                          | Neutral            | 1472 (35.1%) |
|                                                          | Refuse to answer   | 7 (0.2%)     |
|                                                          | Don't know         | 240 (5.7%)   |

<sup>1</sup> number (%) unless stated. May vary from total due to rounding after weighting. <sup>2</sup> Respondents who had not purchased at least one meal out-of-home in the week before survey completion were not asked questions about purchase location. <sup>3</sup> 'management zone' = takeaway management zones around schools, referred to as 'exclusion zones' elsewhere.

Table 2: Survey questions and response options in adult and youth surveys from Wave 5 of the International Food Policy Study, conducted November-December 2021.

| Concept                      | Question wording [Adult]                                                         | Response options [Adult]                                                                                                                                                                                                                                                                                                                                                                                                                                                                                                                                                                                                                                                                                                                                                                                                                       | Question wording [Youth]                                                | Response options [Youth]                                                                                                              |
|------------------------------|----------------------------------------------------------------------------------|------------------------------------------------------------------------------------------------------------------------------------------------------------------------------------------------------------------------------------------------------------------------------------------------------------------------------------------------------------------------------------------------------------------------------------------------------------------------------------------------------------------------------------------------------------------------------------------------------------------------------------------------------------------------------------------------------------------------------------------------------------------------------------------------------------------------------------------------|-------------------------------------------------------------------------|---------------------------------------------------------------------------------------------------------------------------------------|
| Age                          | How old are you?                                                                 | In years (continuous)                                                                                                                                                                                                                                                                                                                                                                                                                                                                                                                                                                                                                                                                                                                                                                                                                          | How old are you?                                                        | 16 years<br>17 years                                                                                                                  |
| Sex                          | What sex were you assigned at birth, meaning on your original birth certificate? | Male<br>Female                                                                                                                                                                                                                                                                                                                                                                                                                                                                                                                                                                                                                                                                                                                                                                                                                                 | What was your sex at birth?                                             | Male<br>Female                                                                                                                        |
| Ethnicity                    | Which of the following best describes your ethnic or racial background?          | White<br>Mixed / Multiple Ethnic Groups<br>Asian / Asian British<br>Black / African / Caribbean / Black British<br>Other Ethnic Group                                                                                                                                                                                                                                                                                                                                                                                                                                                                                                                                                                                                                                                                                                          | Which of the following best describes your ethnic or racial background? | White<br>Mixed / Multiple Ethnic Groups<br>Asian / Asian British<br>Black / African / Caribbean / Black British<br>Other Ethnic Group |
| Level of education completed | What is the highest level of formal education that you have completed?           | 1 – 4 O levels/CSEs/GCSEs (any grades),<br>Entry Level, Foundation Diploma, NVQ<br>Level 1, Foundation GSVQ, Basic Skills<br><br>5+ O levels (passes)/CSEs (grade 1)/GCSEs<br>(grades A*-C/9-4), School Certificate, 1 A<br>level/2-3 AS levels/VCEs, Higher Diploma<br><br>No qualifications<br><br>NVQ Level 2, Intermediate GNVQ, City and<br>Guilds Craft, BTEC First/General Diploma,<br>RSA Diploma, Apprenticeship<br>2+ A levels/VCEs, 4+ AS levels, Higher<br>School Certificate, Progression/Advanced<br>Diploma, NVQ Level 3, Advanced GNVQ,<br>City and Guilds Advanced Craft, ONC, OND,<br>BTEC National, RSA Advanced Diploma<br><br>Foreign qualifications<br><br>Degree (for example BA, BSc), Higher<br>Degree (for example MA, PhD, PGCE)<br><br>Professional qualifications (for example<br>teaching, nursing, accountancy) | -                                                                       | -                                                                                                                                     |

|                                                  |                                                                                                                                                                                                                                            |                                                                                                                  |                                                                                                                                                                                             |                                                                                                                                        |
|--------------------------------------------------|--------------------------------------------------------------------------------------------------------------------------------------------------------------------------------------------------------------------------------------------|------------------------------------------------------------------------------------------------------------------|---------------------------------------------------------------------------------------------------------------------------------------------------------------------------------------------|----------------------------------------------------------------------------------------------------------------------------------------|
| Income adequacy                                  | Thinking about your total monthly income, how difficult or easy is it for you to make ends meet?                                                                                                                                           | Very difficult<br>Difficult<br>Neither easy nor difficult<br>Easy<br>Very easy<br>Don't know<br>Refuse to answer | Thinking about your total monthly income, how difficult or easy is it for you to make ends meet? <sup>4</sup>                                                                               | Very difficult<br>Difficult<br>Neither easy nor difficult<br>Easy<br>Very easy<br>Don't know<br>Refuse to answer                       |
| Family income                                    | -                                                                                                                                                                                                                                          | -                                                                                                                | Does your family have enough money to pay for things your family needs?                                                                                                                     | Not enough money<br>Barely enough money<br>Enough money<br>More than enough<br>Money<br>Don't know<br>Refuse to answer                 |
| Presence of child under 18 in household          | How many of your children under the age of 18 live in your household (including stepchildren or adopted children)?                                                                                                                         | # of children [numeric: 0-10]<br>Don't know<br>Refuse to answer                                                  | -                                                                                                                                                                                           | -                                                                                                                                      |
| Neighbourhood food outlet access                 | Please enter your postcode:<br><br>Postcodes help us to understand the food environment where you live. As a reminder, all information you provide will be kept strictly confidential and will never be shared                             | Postcode: [open text]<br>Don't know<br>Refuse to answer                                                          | -                                                                                                                                                                                           | -                                                                                                                                      |
| Meals purchased from a takeaway in the past week | You said you had [#] meal(s) prepared outside the home in the past 7-days. How many of these meals did you get from each of the following locations?<br><br>Fast food / take-away / café (i.e., order from a counter, online, or by phone) | # of meals [numeric]<br>Don't know<br>Refuse to answer                                                           | Think about the last 7-days.<br><br>How many days did you have a meal (breakfast, lunch or evening meal) from restaurants, fast food or take-away places, food stands, or vending machines? | 0 days (not at all)<br>1 day<br>2 days<br>3 days<br>4 days<br>5 days<br>6 days<br>7-days (every day)<br>Don't know<br>Refuse to answer |
| Consumption of takeaway food in past 24-hours    | -                                                                                                                                                                                                                                          | -                                                                                                                | You just told us about the last 7-days. Now think about yesterday.<br><br>Did you have any of the following yesterday?<br><br>Fast food / take-away from a restaurant                       | Yes<br>No<br>Don't know<br>Refuse to answer                                                                                            |

|                                                                 |                                                                                                              |                                                                                 |                                                                                                                                                 |                                                                                 |
|-----------------------------------------------------------------|--------------------------------------------------------------------------------------------------------------|---------------------------------------------------------------------------------|-------------------------------------------------------------------------------------------------------------------------------------------------|---------------------------------------------------------------------------------|
| Perceived takeaway number appropriateness                       | Thinking about the number of takeaway shops you encounter on a day-to-day basis, do you think there are:     | Too few<br>About the right number<br>Too many<br>Don't know<br>Refuse to answer | Thinking about the number of takeaways <u>near your school</u> , do you think there are:                                                        | Too few<br>About the right number<br>Too many<br>Don't know<br>Refuse to answer |
| Belief about takeaway food healthiness                          | Please tell us whether you agree or disagree with the following:<br><br>Takeaways usually sell healthy food. | Agree<br>Neutral<br>Disagree<br>Don't know<br>Refuse to answer                  | We'd like to know what you think about takeaways (answer true or false to the following statements):<br><br>Takeaways usually sell healthy food | True<br>False<br>Don't know<br>Refuse to answer                                 |
| Belief about takeaway food quality                              | <i>Preamble as above</i><br>Takeaways usually sell food that is poor quality.                                | Agree<br>Neutral<br>Disagree<br>Don't know<br>Refuse to answer                  | -                                                                                                                                               | -                                                                               |
| Belief about the monetary cost of takeaway food                 | <i>Preamble as above</i><br>Takeaways usually sell food that is affordable.                                  | Agree<br>Neutral<br>Disagree<br>Don't know<br>Refuse to answer                  | <i>Preamble as above</i><br>Takeaways usually sell food that is low-cost                                                                        | True<br>False<br>Don't know<br>Refuse to answer                                 |
| Belief about litter, noise and smells from takeaways            | <i>Preamble as above</i><br>Takeaways cause litter, noise and smells                                         | Agree<br>Neutral<br>Disagree<br>Don't know<br>Refuse to answer                  | -                                                                                                                                               | -                                                                               |
| Belief about takeaways and antisocial behaviour                 | <i>Preamble as above</i><br>Takeaways cause antisocial behaviour                                             | Agree<br>Neutral<br>Disagree<br>Don't know<br>Refuse to answer                  | -                                                                                                                                               | -                                                                               |
| Belief about the contribution of takeaways to the local economy | <i>Preamble as above</i><br>Takeaways contribute to the local economy                                        | Agree<br>Neutral<br>Disagree<br>Don't know<br>Refuse to answer                  | -                                                                                                                                               | -                                                                               |
| Belief about takeaway special offers                            | -                                                                                                            | -                                                                               | <i>Preamble as above</i><br>Takeaways have special offers for young people                                                                      | True<br>False<br>Don't know<br>Refuse to answer                                 |
| Belief about takeaways as a social venue                        | -                                                                                                            | -                                                                               | <i>Preamble as above</i><br>Takeaways are an important place for young people to hang out                                                       | True<br>False<br>Don't know<br>Refuse to answer                                 |

---

Impact of adoption of  
a takeaway  
management zone  
around a school

If there were fewer takeaways near schools  
(select all that apply):

Boxes checked or unchecked (i.e. agree or  
disagree)

Young people would be more likely to eat  
lunch in the school canteen

Young people would buy unhealthy food  
from other types of food outlets

Young people would eat takeaway food less  
often

Young people would travel to takeaways  
further away from school

Young people would have takeaway food  
delivered to school

Don't know

Refuse to answer

---

Table 3: Model One; Adjusted Odds Ratios (OR) and 95% Confidence Intervals (CI) of sociodemographic characteristics, measures of the neighbourhood food environment, and takeaway food purchasing practices associated with public acceptability of takeaway management zones among adults living in Great Britain (n=3323)<sup>1</sup>. Data were from Wave 5 of the International Food Policy Study, collected November-December 2021, analysed using logistic regression.

| Measure <sup>2</sup>                                                             | Support for adoption |                   | Perceived effectiveness |                   | Healthier outlets able to open |                   | Healthier school food promotion |                   | Less takeaway food consumption |                   |
|----------------------------------------------------------------------------------|----------------------|-------------------|-------------------------|-------------------|--------------------------------|-------------------|---------------------------------|-------------------|--------------------------------|-------------------|
|                                                                                  | OR                   | 95% CI            | OR                      | 95% CI            | OR                             | 95% CI            | OR                              | 95% CI            | OR                             | 95% CI            |
| Age group (years); 18-29 = ref                                                   |                      |                   |                         |                   |                                |                   |                                 |                   |                                |                   |
| 30-44                                                                            | <b>1.45</b>          | <b>1.10, 1.90</b> | <b>0.51</b>             | <b>0.37, 0.71</b> | <b>1.39</b>                    | <b>1.07, 1.81</b> | 1.05                            | 0.80, 1.36        | <b>1.39</b>                    | <b>1.06, 1.82</b> |
| 45-59                                                                            | <b>2.37</b>          | <b>1.79, 3.15</b> | <b>0.42</b>             | <b>0.30, 0.58</b> | <b>1.35</b>                    | <b>1.02, 1.79</b> | <b>1.34</b>                     | <b>1.02, 1.77</b> | <b>1.59</b>                    | <b>1.20, 2.13</b> |
| 60 or over                                                                       | <b>3.53</b>          | <b>2.65, 4.70</b> | <b>0.47</b>             | <b>0.34, 0.65</b> | <b>1.50</b>                    | <b>1.14, 1.99</b> | <b>1.88</b>                     | <b>1.43, 2.48</b> | <b>1.91</b>                    | <b>1.43, 2.55</b> |
| Sex; Female (vs Male)                                                            | 1.14                 | 0.96, 1.34        | 1.08                    | 0.91, 1.29        | <b>1.19</b>                    | <b>1.01, 1.40</b> | <b>1.19</b>                     | <b>1.01, 1.39</b> | 0.96                           | 0.81, 1.12        |
| Ethnic group identified with; Minority (vs Majority)                             | 1.27                 | 0.96, 1.68        | <b>1.57</b>             | <b>1.11, 2.24</b> | 1.30                           | 0.98, 1.72        | <b>1.44</b>                     | <b>1.09, 1.91</b> | <b>1.45</b>                    | <b>1.09, 1.92</b> |
| Education level; Low = ref                                                       |                      |                   |                         |                   |                                |                   |                                 |                   |                                |                   |
| Medium                                                                           | <b>1.32</b>          | <b>1.08, 1.62</b> | 1.02                    | 0.82, 1.26        | 1.00                           | 0.82, 1.21        | 1.05                            | 0.86, 1.28        | 1.11                           | 0.90, 1.35        |
| High                                                                             | <b>1.63</b>          | <b>1.35, 1.96</b> | 1.15                    | 0.94, 1.40        | 0.98                           | 0.82, 1.17        | 1.17                            | 0.98, 1.40        | 1.16                           | 0.97, 1.40        |
| Ability to make ends meet; Easy (vs Not easy)                                    | <b>1.46</b>          | <b>1.24, 1.73</b> | 1.16                    | 0.97, 1.39        | 1.15                           | 0.98, 1.36        | 1.17                            | 0.99, 1.38        | <b>1.19</b>                    | <b>1.01, 1.41</b> |
| Child under 18 years in household; Yes (vs No)                                   | 0.91                 | 0.73, 1.13        | <b>1.51</b>             | <b>1.18, 1.93</b> | 0.94                           | 0.77, 1.16        | 1.17                            | 0.95, 1.44        | 1.04                           | 0.84, 1.29        |
| Quartile (Q) of neighbourhood food outlet access (count); Q1 (0-9 outlets) = ref |                      |                   |                         |                   |                                |                   |                                 |                   |                                |                   |
| Q2 (10-25 outlets)                                                               | 0.89                 | 0.71, 1.12        | 1.23                    | 0.97, 1.57        | 1.03                           | 0.83, 1.29        | 1.01                            | 0.81, 1.26        | 0.98                           | 0.78, 1.23        |
| Q3 (26-55 outlets)                                                               | 1.00                 | 0.79, 1.25        | 1.08                    | 0.85, 1.38        | 1.06                           | 0.85, 1.33        | 1.06                            | 0.85, 1.33        | 1.17                           | 0.93, 1.47        |
| Q4 (56-581 outlets)                                                              | 0.91                 | 0.71, 1.15        | 1.11                    | 0.86, 1.43        | 1.05                           | 0.83, 1.32        | 1.15                            | 0.91, 1.45        | 1.19                           | 0.94, 1.51        |
| Meals purchased from takeaways in the past week (count); 0 = ref                 |                      |                   |                         |                   |                                |                   |                                 |                   |                                |                   |
| 1                                                                                | 0.86                 | 0.70, 1.05        | 1.01                    | 0.81, 1.27        | 1.11                           | 0.91, 1.36        | 1.12                            | 0.92, 1.37        | 1.17                           | 0.96, 1.44        |
| 2 or more                                                                        | 0.80                 | 0.62, 1.01        | 1.09                    | 0.83, 1.43        | 1.24                           | 0.98, 1.57        | 1.06                            | 0.83, 1.34        | 1.14                           | 0.89, 1.45        |

<sup>1</sup> All results are adjusted for all other measures listed. Bold = significant at the P<0.05 level. <sup>2</sup> 'ref' = reference category.
